# Supplementary material for: Multi-modal scene graph inspired policy for visual navigation
Source: Springer Nature journal article supplement (doi:10.1007/s11227-024-06541-8), 2024-10-30
Supplement: 11227_2024_6541_MOESM1_ESM.pdf [file 11227_2024_6541_MOESM1_ESM.pdf]

**Table 5** Example of our task planning generation.

| Prompt                             | Input                                                                                                                                                                                                                                    | Output                                                                                                                                                                                                                                                                                                                                                                                                                                                                                                                      |
|------------------------------------|------------------------------------------------------------------------------------------------------------------------------------------------------------------------------------------------------------------------------------------|-----------------------------------------------------------------------------------------------------------------------------------------------------------------------------------------------------------------------------------------------------------------------------------------------------------------------------------------------------------------------------------------------------------------------------------------------------------------------------------------------------------------------------|
| Please water the plant             | [Pillow, HousePlant, Book, Painting, Statue, Shelf, CellPhone, Watch, Curtains, CoffeeTable, Box, Sofa, Laptop, FloorLamp]                                                                                                               | Step 1. Locate the houseplant and water can<br>Step 2. Grasp the watering can<br>Step 3. Move to the houseplant<br>Step 4. Pour water on the Houseplant<br>Step 5. Place the watering can down<br>Step 6. Done'                                                                                                                                                                                                                                                                                                             |
| Can you draw the curtains?         | [Painting, Pen, Pillow, CreditCard, Mirror, Safe, SideTable, HousePl, DiningTable, Newspaper, DeskLamp, Book, Curtains, Sofa, FloorLamp, ant, Laptop, ArmChair, DogBed, Ottoman, KeyChain, Shelf, Watch, CoffeeTable]                    | Step 1. Move to the curtains<br>Step 2. Grasp the curtains<br>Step 3. Pull the curtains towards yourself to draw them<br>Step 4. Release the curtains once they are closed<br>Step 5. Done',                                                                                                                                                                                                                                                                                                                                |
| Can you help me clean the kitchen? | [DishSponge, WineBottle, Kettle, PepperShaker, Curtains, HousePlant, Lettuce, Bottle, Cabinet, SideTable, CounterTop, Fork, Blinds, Chair, CounterTop, Shelf, Apple, Microwave, CellPhone, StoveBurner, Faucet, LightSwitch, Knife, Pen] | Step 1. Grasp the DishSponge<br>Step 2. Move to the countertop<br>Step 3. Grasp the Kettle<br>Step 4. Move the Kettle<br>Step 5. Repeat Step 3 and 4 for WineBottle, Bottle, and Knife respectively.<br>Step 6. Pour water from Kettle onto a clean cloth.<br>Step 7. Clean the Countertop using the cloth<br>Step 8. Clean the cabinet handles<br>Step 9. Clean the sink handles and faucet<br>Step 10. Clean the StoveBurner<br>Step 11. Move the Kettle, Bottle and Knife back to their original place.<br>Step 12. Done |
